1 **Changes in nanomechanical properties of single neuroblastoma cells as a model**  
2 **for oxygen and glucose deprivation (OGD)**

3  
4 Tomasz Zieliński<sup>1</sup>, Joanna Pabijan<sup>1</sup>, Bartłomiej Zapotoczny<sup>1</sup>, Joanna Zemła<sup>1</sup>, Julita  
5 Wesółowska<sup>2</sup>, Joanna Pera<sup>3</sup> and Małgorzata Lekka<sup>1\*</sup>,

6  
7 <sup>1</sup>Department of Biophysical Microstructures, Institute of Nuclear Physics, Polish  
8 Academy of Sciences, PL-31342, Krakow, Poland

9 <sup>2</sup>Laboratory of in vivo and in vitro imaging, Maj Institute of Pharmacology, Polish  
10 Academy of Sciences, 12 Smętna St., PL-31343 Kraków, Poland

11  
12 <sup>3</sup>Department of Neurology, Faculty of Medicine, Jagiellonian University Medical College,  
13 Botaniczna 3, PL-31503, Kraków, Poland

14  
15 \* Corresponding Author

16 Malgorzata.lekka@ifj.edu.pl  
17  
18  
19  
20  
21  
22  
23  
24  
25  
26  
27

28 **Abstract**

29 The biological processes underlying ischemic stroke, although complex, are better  
30 known than those related to biomechanical alterations of single cells. Mechanisms of  
31 biomechanical changes and their relations to the molecular processes are crucial for  
32 understanding the function and dysfunction of the brain. In our study, we applied atomic  
33 force microscopy (AFM) to quantify the alterations in biomechanical properties in  
34 neuroblastoma SH-SY5Y cells subjected to oxygen and glucose deprivation (OGD) and  
35 reoxygenation (RO). Obtained results reveal several characteristics. Cell viability  
36 remained at the same level, regardless of the OGD and RO conditions, but, in parallel,  
37 the metabolic activity of cells decreased with OGD duration. 24h RO did not recover the  
38 metabolic activity fully. Cells subjected to OGD appeared softer than control cells. Cell  
39 softening was strongly present in cells after 1h of OGD and, with longer OGD duration  
40 and in RO conditions, cells recovered their mechanical properties. Changes in the  
41 nanomechanical properties of cells were attributed to the remodelling of actin filaments,  
42 which was related to cofilin-based regulation and impaired metabolic activity of cells.  
43 The presented study shows the importance of nanomechanics in research on ischemic-  
44 related pathological processes such as stroke.

45

46 **Keywords:** cell biomechanics; oxygen and deprivation model; neurodegenerative  
47 diseases; stroke;

48

49

## 50 **Introduction**

51 Ischemic stroke remains one of the leading causes of death, especially in the elderly<sup>1</sup>. It  
52 is caused by disrupted blood flow to the brain resulting in oxygen and glucose  
53 deficiencies in the cells. The last three decades show significant improvements in acute  
54 treatment, resulting in increased life expectancy after treatment and rehabilitation<sup>1,2</sup>.  
55 Understanding the stroke at the cellular level can be simulated using an in vitro oxygen-  
56 glucose deprivation (OGD) model. The model was widely investigated to study ischemic  
57 cell death<sup>3</sup>. In the model, cells or tissue slices are exposed to hypoxic or anoxic  
58 conditions and cultured in media deprived of glucose. Not only the effect of OGD is  
59 investigated in the model – after changing media and introducing normal oxygen levels,  
60 reperfusion can be additionally tested. With long-lasting OGD, the reoxygenation may  
61 paradoxically cause additional damage. Ischemia-reperfusion injury is caused by the  
62 immediate generation of reactive oxygen species, altered ion transport, and calcium  
63 influx<sup>4</sup>. During OGD, rapid remodeling of the actin cytoskeleton was reported to be  
64 involved in the blood-brain barrier disruption and affected: endothelial cells<sup>5</sup>, non-  
65 neuronal brain cells<sup>6</sup>, and neurons<sup>7</sup>.

66 Actin filaments occur in a cell as a meshwork or bundles of parallel fibers abundant,  
67 particularly close beneath the cell membrane<sup>8,9</sup>. The continuous control of the balance  
68 between polymerization and depolymerization ensures a dynamic equilibrium state,  
69 controlling cell architecture, mechanical resistance, and regulating many biological  
70 processes<sup>10</sup>. The dynamic of this process is regulated by actin-binding proteins<sup>11</sup>.  
71 Cofilin, an actin-depolymerizing factor, was highlighted several times to play a crucial  
72 role in actin remodeling in axons<sup>7,12,13</sup>. In ischemia-induced actin disruption, cofilin was

73 linked with ATP depletion<sup>14</sup>. It has already been reported that cofilin is essential for an  
74 early phase of apoptosis<sup>15</sup> or intracellular contractile force generation<sup>16</sup>. The  
75 responsibility of cofilin and its role in various diseases makes it a potential target for  
76 potential neuroprotective approaches in the early stages of ischemic brain injury. In  
77 particular, the SH-SY5Y human neuroblastoma cell line is used to investigate the OGD  
78 model of stroke<sup>17</sup>. The cell line is of human origin, allowing for a better reflection of the  
79 induced changes during the stroke. Both non-differentiated and differentiated SH-SY5Y  
80 cells have their advantages and drawbacks in the model of neuron cells<sup>18</sup>. In this report,  
81 we used undifferentiated cells, which are considered to be most reminiscent of  
82 immature neurons<sup>19,20</sup>.

83 In the present study, we hypothesize that possible involvement of cofilin occurs in  
84 the early stages of cytoskeleton remodelling under ischemic conditions. In the initial  
85 phase, such remodelling is limited to actin filaments reorganization, which can be  
86 quantitatively evaluated using an atomic force microscope (AFM)<sup>21</sup>. This technique is  
87 characterized by nanoscale resolution enabled to quantify fine alterations in cells and  
88 tissue nanomechanical properties in normal and pathological conditions<sup>22–25</sup>. The  
89 changes in mechanical properties have already been shown in undifferentiated SH-  
90 SY5Y cells in a model of chemically induced neurodegeneration<sup>26</sup>. The results,  
91 associated with glutamate-mediated neurodegeneration, showed the increased rigidity  
92 of SH-SY5Y cells upon 50 mM N-methyl-D-aspartate (NMDA) treatment. Although the  
93 experiment time was limited to 60 min, the maximum rigidity values were obtained after  
94 20 minutes<sup>26</sup>. Thus, NMDA induced cytoskeletal reorganization. However still,  
95 knowledge about the mechanical changes in OGD/reoxygenation (RO) is lacking. Thus,

96 we analyzed the nanomechanical properties of SH-SY5Y neuroblastoma cells exposed  
97 to oxygen and glucose deprivation, mimicking ischemic conditions. Following our  
98 previous studies on the effect of anti-tumor drugs on prostate cancer cells<sup>27</sup>, two  
99 indentations were applied, i.e., shallow (400 nm) and deep (1200 nm) ones. The  
100 shallow indentation reveals mechanical properties dominated by actin filaments, while  
101 the deep indentation may contain the additional contribution from deeper parts of the  
102 cells like the microtubular network and cell nucleus<sup>27,28</sup>. The studies were accompanied  
103 by evaluating the cofilin and phosphorylated cofilin expression levels, visualization of  
104 actin filaments organization quantified using morphometric parameters, and metabolic  
105 activity of SH-SY5Y cells subjected to OGD. Measurements were conducted directly  
106 after OGD to study the magnitude of the induced changes and after 24h of  
107 reoxygenation to model reperfusion and to evaluate the reversibility of these changes.

108

## 109 **Results**

### 110 **Viability of SH-SY5Y cells under OGD**

111 To assess the effect of OGD exposure (5% CO<sub>2</sub>, 0.1% O<sub>2</sub>) on neuroblastoma SH-SY5Y  
112 cells, we exposed SH-SY5Y human neuroblastoma cells to OGD for 1, 3, and 12 hours,  
113 followed by 24 hour-RO. (**Fig. 1**).

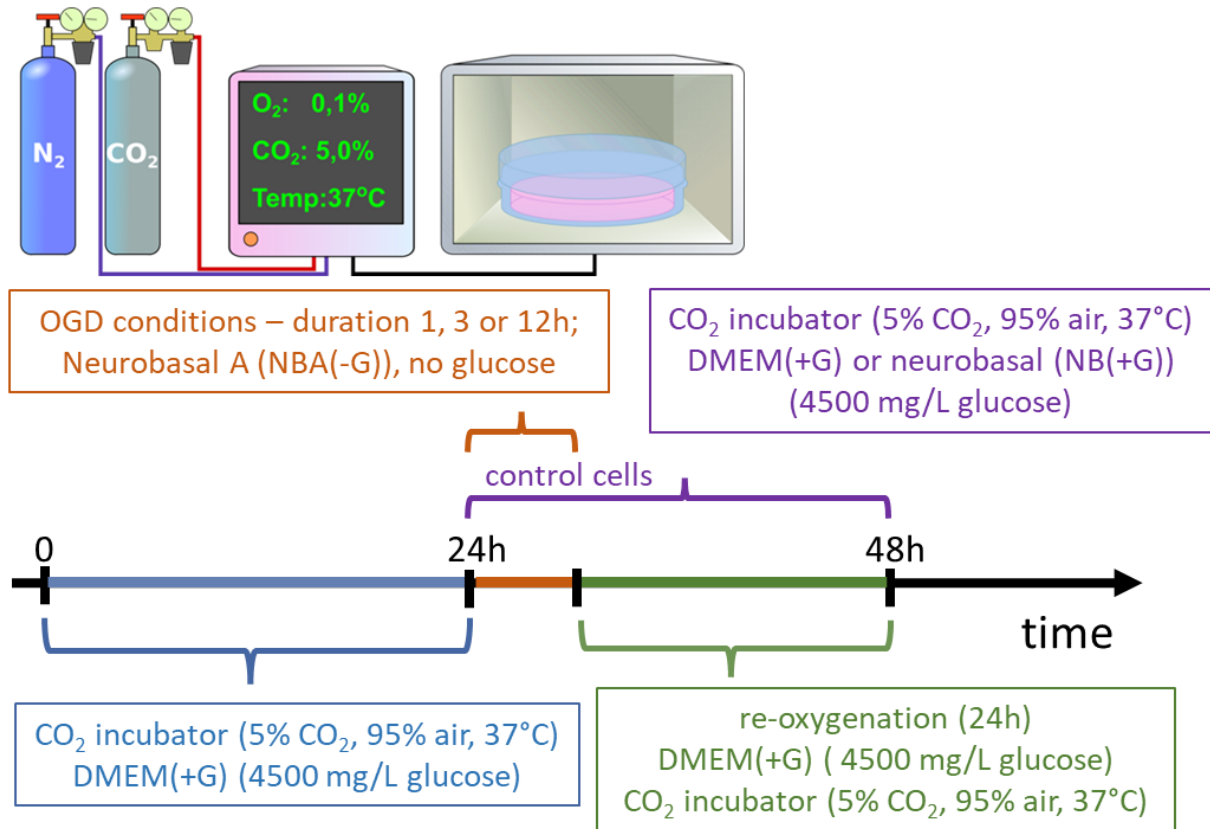

114

115 **Figure 1.** (a) A scheme showing three steps of sequential OGD applied to living SH-  
116 SY5Y cells. Firstly, cells were cultured for 24 hours after seeding in 5%  $CO_2$ , 95%  
117 atmosphere (37°C) in a DMEM with 4500 mg/ml of glucose (DMEM(+G)). They refer  
118 here as control cells. Next, the medium was exchanged to NBA(-G), and cells were  
119 placed in a table  $CO_2$  incubator for 1h, 3h, or 12h at 0.1%  $O_2$  (referred to as OGD  
120 conditions and OGD cells). Finally, OGD cells were rinsed with a DMEM(+G) in the  
121 atmosphere of 5%  $CO_2$  and 95% air (reoxygenation conditions, , in addition, non-OGD  
122 cells were kept in DMEM(+G)). (b) Phase-contrast image showing the morphology of  
123 neuroblastoma SH-SY5Y cells cultured for 24h in NB(+G), as it induced differentiation  
124 resulting in a neuron-like morphology with numerous, fine protrusions (neurite-like  
125 structures). Scale bar – 50  $\mu m$ .

126

127 We compare four groups of data, namely, control (C, measurements were conducted in  
128 neurobasal medium, which contained 4500 mg/L of glucose, referred here as NB(+G)),  
129 OGD cells (in neurobasal A medium without glucose, NBA(-G)), reoxygenated OGD  
130 cells (DMEM, which contained 4500 mg/L of glucose, DMEM(+G)) and additional control  
131 (i.e. non-OGD) cells kept in DMEM(+G) for the same time as re-oxygenated (RO) OGD  
132 cells.

133 We started with the assessments of metabolic activity (using MTS assay; reduction of  
134 tetrazolium; impaired NAD(P)H metabolism<sup>29</sup>) and cell viability (using LDH assay;  
135 lactate dehydrogenase release to culture media, membrane damage<sup>30</sup>) that were  
136 applied to samples collected directly after OGD and after 24h of reoxygenation. The  
137 results show that cell metabolism and viability depended on OGD duration (**Fig. 2**).  
138 Moreover, the induced changes are still present in cells after reoxygenation.

139

140

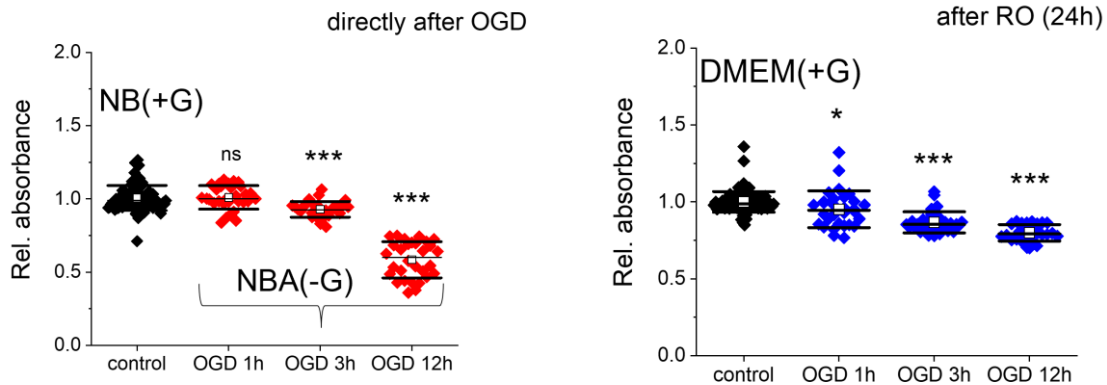

141 a)

b)

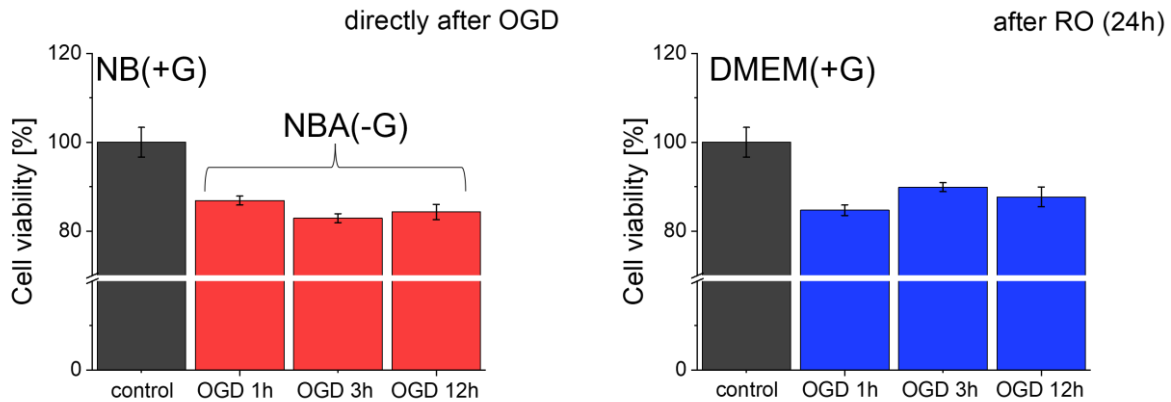

142 c)

d)

143 **Figure 2.** Metabolic level and viability of SH-SY5Y neuroblastoma cells assessed by  
144 MTS (a,b) and LDH (c,d) assays, directly after OGD (a,c) and after 24h of  
145 reoxygenation (b,d). Each dot denotes a single readout from the ELISA reader. (a, b) A  
146 mean (open circle), median (black line), standard deviation (SD, box size) were  
147 determined from data gathered from 3 independent repetitions. (c,d) Columns represent  
148 a mean value from 12 ELISA readouts ( $n = 3$  independent repetitions). Relative  
149 absorbance was normalized to values obtained for the control samples. Statistical  
150 significance: *ns* – not statistically significant,  $p > 0.05$ ,  $*p < 0.05$ ,  $***p < 0.001$ .

151



152 We tested how 1h, 3h, and 12h of OGD affect cell metabolism of SH-SY5Y cells  
153 (**Fig. 2ab**). The MTS tetrazolium is reduced by cells to formazan soluble in the culture  
154 medium. Such conversion is presumably accomplished by NADPH or NADH produced  
155 by dehydrogenase enzymes in metabolically active cells<sup>29,31</sup>. Thus, lower absorbance in  
156 comparison with control cells denotes the lower metabolic activity of cells. Our results  
157 show a significant reduction in formazan conversion after 3h and 12h. After one hour of  
158 the cell exposure to OGD, the metabolic activity level was similar to that of control cells,  
159 and no significant difference was identified ( $p = 0.262$ ; **Fig. 2a**). However, we do  
160 observe changes in reoxygenation for all three groups of cells subjected to OGD. The  
161 MTS-based cell viability assessed directly after OGD experiments dropped by about  
162 7.1% ( $p < 0.001$ ) and 41.5% ( $p < 0.001$ ) after 3h and 12h of cell exposure to OGD,  
163 respectively (**Fig. 2b**). In parallel, we checked membrane integrity by LDH assay related  
164 to the number of viable cells. A drop of about 13% – 17% was observed for cells after  
165 OGD (**Fig. 2c**). A similar drop in the number of viable cells was observed for cells kept  
166 for 24h in RO. A drop between 12%-15% was obtained (**Fig. 2d**).

167 We expect that cells being damaged by OGD will recover their ability to proliferate<sup>32</sup>.  
168 Therefore, both MTS and LdH assays have also been applied to cells cultured in  
169 reoxygenation conditions. MTS results revealed significant changes in all groups of cells  
170 (**Fig. 2b,d**). The most significant drop in cell metabolic activity was observed for cells  
171 subjected to OGD for 12h, while a small change, but still statistically significant, was  
172 recorded for cells after 1h of OGD. Interestingly, the level of LdH remained at a similar  
173 level for both control and treated (OGD, RO) cells (**Fig. 2c,d**), indicating no correlation  
174 between cell viability and metabolic activity of cells, regardless of their treatment.

175 These results show that only metabolic activity was affected after prolonged OGD.  
176 Lower metabolic activity was not related to the number of viable cells (or more precisely  
177 to the impaired membrane integrity). No new cells were dying after 24h OGD, but their  
178 metabolism activity was altered after OGD.

179

### 180 **The effect of different OGD duration on mechanical properties of SH-SY5Y cells**

181 To assess whether the altered metabolic activity is related to nanomechanical  
182 properties of SHSY%Y cells, AFM working in a force spectroscopy mode was employed  
183 to conduct the measurements over a nuclear region of the cell (to avoid the influence of  
184 stiff substrates<sup>33</sup>). The nanomechanical properties were quantified by Young's (elastic)  
185 modulus calculated by applying Hertz-Sneddon contact mechanics<sup>22,34</sup>, assuming that  
186 a cone can approximate the shape of the probing pyramidal tip (**Fig. 3**).

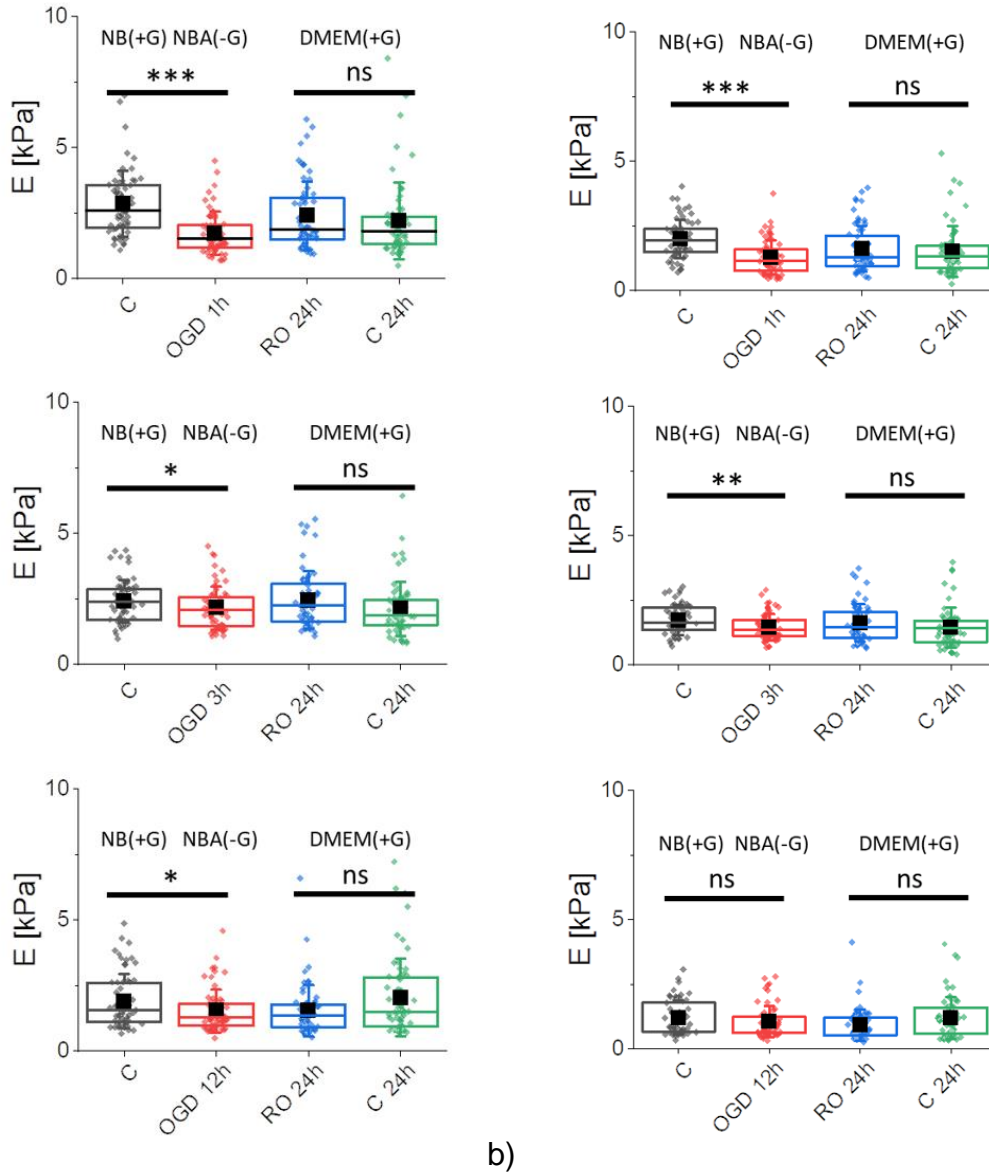

187 a)

b)

188 **Figure 3.** Nanomechanical properties of SH-SY5Y neuroblastoma cells after OGD  
189 treatment, quantified by the apparent Young's modulus calculated for the indentation  
190 depth of 400 nm (a) and 1200 nm (b). Four groups of cells were compared: control (C,  
191 NB(+G)), OGD cells (OGD 1h, 3h, or 12h, NBA(-G)), reoxygenated OGD cells (RO 24h,  
192 DMEM(+G)), and control, non-OGD cells (C 24h) kept in DMEM(+G) for the same time  
193 as reoxygenated OGD cells. Box plots represent a median (black line), a mean (solid  
194 square), standard deviation (whiskers), and 25% and 75% percentiles (box) from  $n = 60$

195 cells. Statistical significance: ns – not statistically significant ( $p > 0.05$ ), \* $p < 0.05$ ,  
196 \*\* $p < 0.01$ , \*\*\* $p < 0.001$ .

197

198 Young's modulus was calculated at the shallow and deep indentations, i.e., 400 nm and  
199 1200 nm, respectively. Alongside the already published data<sup>22,28,35,36</sup>, the  
200 nanomechanical response of cells measured at shallow indentation (400 nm) reflects  
201 mainly the mechanics of the actin cortex. Thus, any alteration in cell mechanics can be  
202 related to the remodelling of actin filaments underlying beneath the cell membrane.  
203 AFM can measure only cells attached to the underlying surface; thus, to a certain  
204 extent, the mechanical properties of cells reflect the mechanics of cells resistant to  
205 unfavorable conditions. Cells heavily affected by OGD detached from the surface were  
206 not accessible for the AFM measurements. Still, in our study, mean values of Young's  
207 modulus of OGD-treated cells significantly dropped by about 39.2% ( $p < 0.001$ ), 10.7%  
208 ( $p = 0.045$ ), and 19.4% ( $p = 0.042$ ) for 1h, 3h, and 12h OGD in relation to control cells,  
209 respectively (**Fig. 2a**). Reoxygenation recovers the nanomechanical properties of cells  
210 close to values obtained for control, non-OGD cells kept in DMEM(+G) for 24h (same  
211 duration as reoxygenation). The elastic moduli are  $2.40 \pm 1.31$  kPa versus  $2.22 \pm 1.46$   
212 kPa ( $p = 0.401$ ),  $2.46 \pm 1.09$  kPa versus  $2.12 \pm 1.03$  kPa ( $p = 0.084$ ), and  $1.55 \pm 0.98$   
213 kPa versus  $1.05 \pm 1.48$  kPa ( $p = 0.110$ ) for OGD-treated and non-treated cells,  
214 correspondingly. Thus, we can conclude that the recovery of the actin cortex occurs  
215 independently of the OGD duration. The largest changes were observed in cells after 1h  
216 OGD, but simultaneously, 24h of reoxygenation allowed cells to almost fully recover  
217 their mechanics. Longer OGD (3h and 12h) resulted in smaller mechanical changes  
218 than those observed after 1h of OGD.

219           The analysis of deeper indentations (like here 1200 nm) can evaluate the  
220 combined contributions of the actin cytoskeleton and other structural components of  
221 cells such as microtubules or cell nuclei. Mechanics of cells measured directly after  
222 OGD shows a significant drop after 1h and 3h. The apparent Young's modulus dropped  
223 by 35.5% ( $p > 0.001$ ) and 16.8% ( $p = 0.007$ ), respectively (**Fig. 2b**). The OGD-induced  
224 mechanical changes were statistically insignificant after 12h of cell exposure to such  
225 conditions ( $p = 0.188$ ). A similar level of changes suggests a weaker contribution of  
226 other cellular structures as compared to the actin cytoskeleton. In reoxygenated cells,  
227 changes in mechanical properties of OGD and non-OGD cells were statistically  
228 insignificant, showing a lack of mechanical contributions from deeper cellular layers.  
229 These results demonstrate that the mechanical response mainly contains the dominant  
230 contribution from the actin cytoskeleton.

231

### 232 **Organization of actin cytoskeleton in OGD-treated SH-SY5Y cells**

233 Phase-contrast images collected prior to the AFM measurements did not show any  
234 particular changes in the macroscopic morphology. OGD treated cells reveal similar  
235 spindle and neuron-like morphology as control, non-treated cells, regardless of the OGD  
236 duration. As changes in cell mechanics are typically related to the organization of actin  
237 filaments, the confocal images with fluorescently labelled F-actin and cell nucleus were  
238 analyzed (**Fig. 4**).

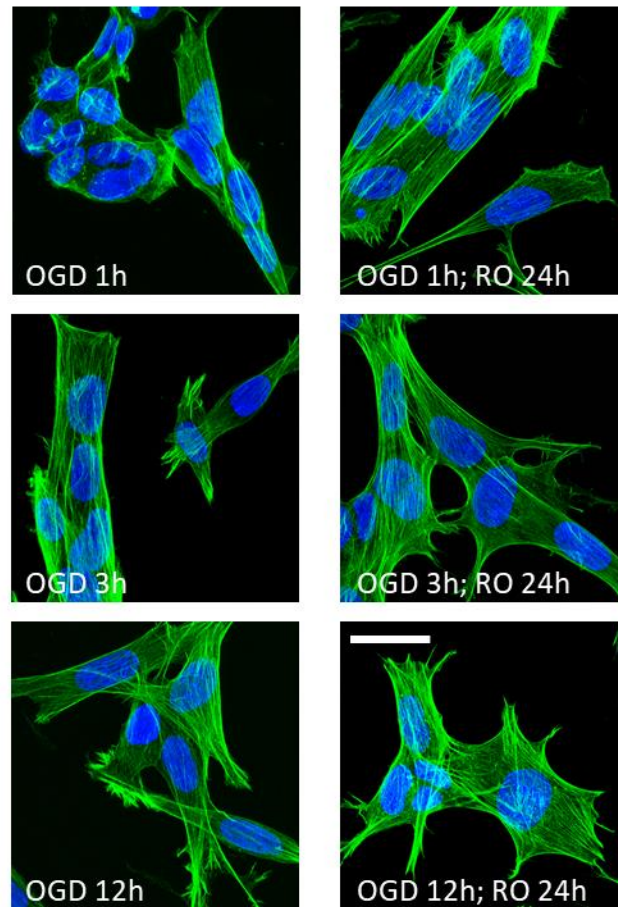

239

240 **Figure 4.** Confocal images of the actin cytoskeleton in OGD-treated and reoxygenated  
241 cells. Staining: actin filaments – phalloidin conjugated with Alexa Fluor 488, cell nuclei –  
242 Hoechst 33342; scale bar 25  $\mu\text{m}$ .

243

244 In control and OGD treated cells, the organization of actin cytoskeleton was very similar,  
245 showing nicely actin bundles spanning over the whole cell. The only exception was cells  
246 visualized directly after 1h OGD, where cells change their morphology from a widely  
247 spread to a packed one (**Fig. 4**). This is consistent with the mechanical results showing  
248 the largest drop in the apparent Young's (elastic) modulus. The organization of actin  
249 filaments in cells undergoing longer OGD treatment (3h and 12h) was barely visible,  
250 supporting weak changes in nanomechanical properties. Altogether, these results

251 support the conclusion that the nanomechanical properties of cells are dominated by  
252 actin filament organization.

253

### 254 Cell spreading as a measure of cell attachment

255 In our further steps, we performed a deeper analysis of the shape of individual cells

256 using images recorded by epi-fluorescent microscopy (**Fig. 5**).

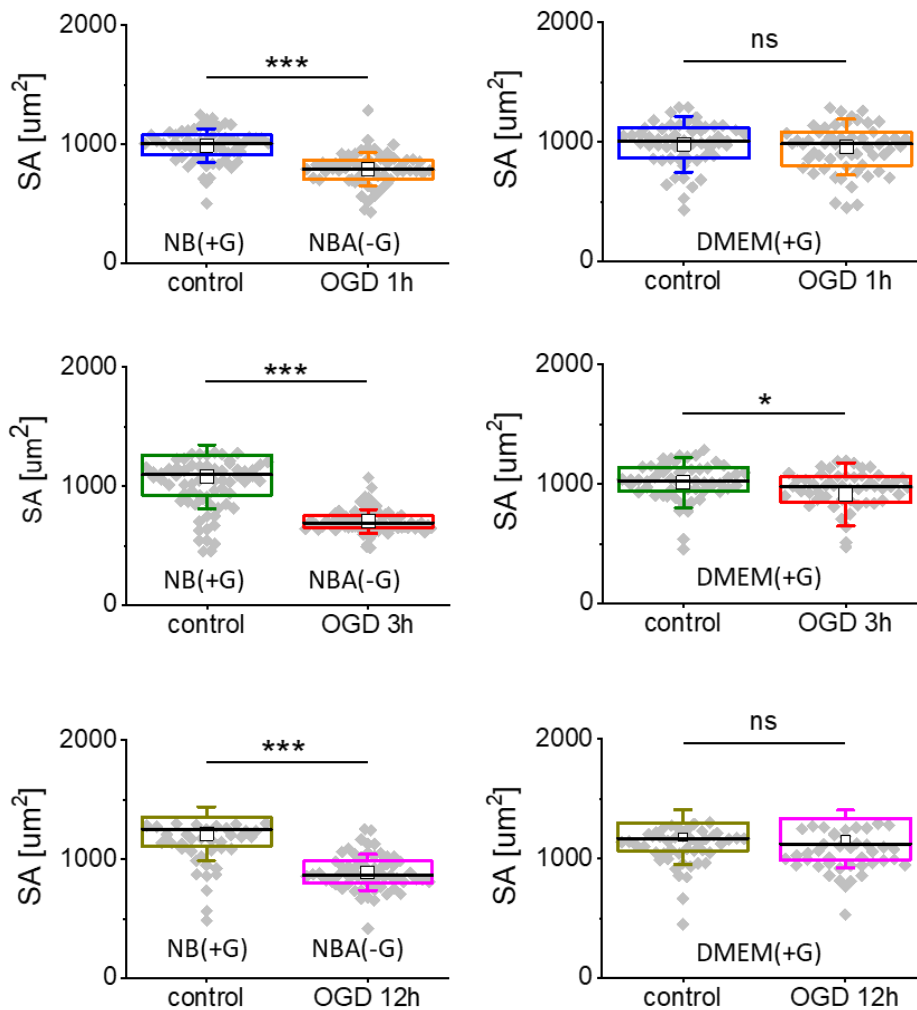

257

258 **Figure 5.** Spreading area (SA) of cells after OGD (a) and reoxygenation (b). Each dot  
259 denotes an average surface area of individual cells. Boxplot represents basic statistical  
260 parameters (mean, median, standard deviation, and 25% and 75% percentiles from

261 n = 60 fluorescent images). Statistical significance: *ns* – not statistically significant  
262 ( $p > 0.05$ ),  $*p < 0.05$ ,  $***p < 0.001$ .

263

264 The results revealed that OGD-treated cells have different surface areas indicating  
265 impairments in their spreading on the surface (**Fig. 5a**). The smaller the surface area,  
266 the worse their attachments/adhesion to the surface is. The weak attachment of cells to  
267 the underlying surface was recovered after allowing cells to grow in reoxygenation  
268 conditions (**Fig. 5b**). The largest change in spreading area was observed for OGD-  
269 treated cells, while during reoxygenation, cells return to the surface area of control, non-  
270 treated cells. These results indicate that the spreading of cells involves the remodelling  
271 of actin filaments, which in our case is strongly related to the OGD treatment of SH-  
272 SY5Y cells.

273

274 **The shrinking of the cells is confirmed by the nucleus to cell ratio.**

275 Changes in cell surface area and lack of strong reorganization of the actin filaments  
276 suggest different mechanisms inducing alterations in nanomechanical properties of  
277 OGD-treated cells, such as changes in cell volume. A ratio between cell surface area  
278 (*C*) and cell nucleus (*N*) can quantify the latter (**Fig. 6**).

279



280

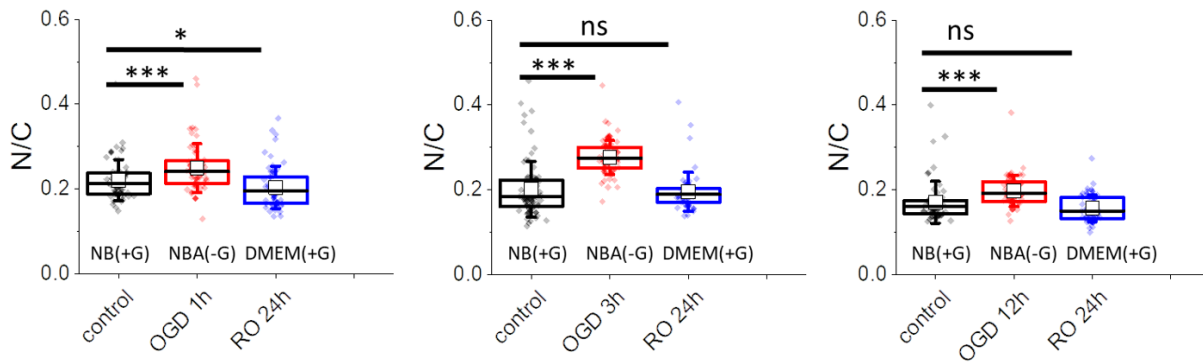

281

282 **Figure 6.** Nucleus to cytoplasm ( $N/C$ ) ratio of cells after OGD treatment and  
283 reoxygenation. Each dot denotes an average value of individual cells. Boxplot  
284 represents basic statistical parameters, i.e., mean (open square), median (line), and  
285 standard deviation, from  $n = 60$  cells. Statistical significance: *ns* – not statistically  
286 significant \* $p < 0.05$ , \*\*\* $p < 0.001$ .

287

288 The  $N/C$  value close to 1 indicates the dominant contribution of a cell nucleus in the  
289 surface area value, while its value close to 0 indicates a significant contribution from the  
290 cytoplasm.

291 The results show that the  $N/C$  ratio increases in cells visualized directly after OGD for all  
292 three tested timepoints and reaches the level of control cells after 24h of cell  
293 reoxygenation in all groups. Rough estimation of cell height from the cross-section of  
294 confocal images (from **Fig. 4**), shows that the height of the cell in the central area is  
295  $7.3 \mu\text{m} \pm 1.4 \mu\text{m}$  ( $n = 14$  cells),  $8.3 \mu\text{m} \pm 2.0 \mu\text{m}$  ( $n = 11$ )  $10.9 \mu\text{m} \pm 2.8 \mu\text{m}$  ( $n = 10$ ) for  
296 cells after 1h, 3h, and 12h OGD, respectively. Altogether, these results show that the  
297 height of cells increases during OGD treatment.

298

299

300 **Cofilin level in OGD-treated SH-SY5Y cells**

301 Cofilin is an actin regulating protein that quickly responds to various cell processes.  
302 Alterations in calcium ions, reactive oxygen species, ATP, or pH will result in quick  
303 dephosphorylation (activation) of cofilin<sup>37</sup>. Cofilin severs actin filaments but does not  
304 enhance actin depolymerization rate<sup>38</sup>. Instead, it creates new nucleation centres  
305 allowing for quick branching, polymerization, and depolymerization in a concentration-  
306 dependent manner<sup>39</sup>. The results of cofilin and p-cofilin expression levels in control and  
307 OGD treated cells are presented in **Fig. 7**.

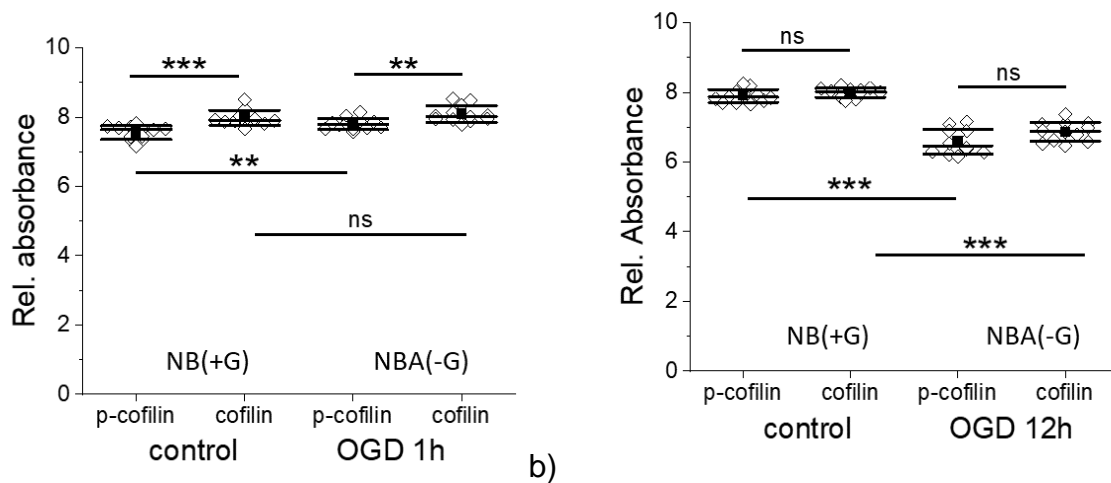

308 a)

b)

309 **Figure 7.** Cofilin and p-cofilin (phosphorylated cofilin) expression level in SH-SY5Y cells  
310 upon 1h (a) and 12h (b) OGD. Control cells were kept in NB(+G), while OGD cells were  
311 kept in NBA(-G). A mean (black square), median (black middle line), standard deviation  
312 (SD, outside black lines) were determined from data gathered from 3 independent  
313 repetitions. Statistical significance (*ns* – not statistically significant, *\*\*p* < 0.01,  
314 *\*\*\*p* < 0.001).

315

316 We observed the difference in the cofilin and p-cofilin levels in control cells that could be  
317 linked with a lower glucose level observed by proliferating cells in a given volume during  
318 a certain culture time<sup>40</sup>. When cofilin/p-cofilin was assessed in control cells  
319 simultaneously as cells after 1h of OGD, the concentration of cofilin was about 5%  
320 higher than p-cofilin ( $p < 0.001$ ). In 1h OGD treated cells, the concentration of cofilin  
321 was only 3.5 % larger than p-cofilin ( $p < 0.002$ ). In cells exposed to longer OGD  
322 duration, the expression level of cofilin in relation to p-cofilin vanishes (the same protein  
323 level was observed in cells after 3h and 12h OGD (**Fig. 7b** shows results of cofilin/p-  
324 cofilin expression in SH-SY5Y cells after 12h OGD). Next, we compare the differences  
325 between the expression level of cofilins (or p-cofilins) for control and OGD treated cells.  
326 The determined  $p$ -values were (i)  $p = 0.006$  (p-cofilin, between control and OGD (1h)  
327 cells) and  $p = 0.198$  (cofilin, between control and OGD (1h) cells); (ii)  $p < 0.0001$   
328 (between control and OGD (3h) cells, regardless of the cofilin status); (iii)  $p < 0.0001$   
329 (between control and OGD (3h) cells, regardless of the cofilin status). These results  
330 show that the ratio between cofilin/p-cofilin changes significantly during 1h OGD and  
331 vanish for a longer duration of OGD. Interestingly, the expression level of cofilin and p-  
332 cofilin in OGD cells decreases with OGD duration. Only, the expression level of p-cofilin  
333 changed.

334

## 335 **Discussion**

336 Oxygen and glucose deprivation (OGD) is commonly used to study cerebral ischemic  
337 stroke. It mimics the process of a sudden disruption of blood flow to the brain. The lack  
338 of blood supply leads to decreased oxygen and glucose levels in the brain. The induced

339 injuries activate various biochemical processes such as perturbation of calcium  
340 homeostasis<sup>41</sup>, malfunction of endoplasmic reticulum and mitochondria<sup>42</sup>, increased  
341 level of oxidative stress linked with DNA damage<sup>43</sup>. They directly affect cell morphology,  
342 which suggests changes in mechanical properties of OGD treated cells. In our work,  
343 AFM was applied to probe nanomechanical properties at the cellular level.  
344 Nanomechanics has already been reported to be altered during stroke<sup>44</sup>. The results  
345 have shown that tissue mechanics changes within the region affected by stroke and,  
346 also, at a distance from the stroke site<sup>44</sup>. AFM has shown the alterations in mechanical  
347 properties of the brain region severely affected by ischemia. Neuronal cells are  
348 mechanosensitive and highly responsive to altered mechanics of the surrounding  
349 environment <sup>45</sup>. Thus, changes in the mechanical properties of ischemic tissue denote  
350 also changes in the functioning of neuronal cells.

351 Our study focused on the nanomechanical properties of SH-SY5Y cells subjected  
352 to OGD of different duration followed by 24-hour reoxygenation. AFM-based elasticity  
353 measurements were conducted at the shallow and deep indentations, which enabled us  
354 to quantify the changes occurring mainly in the network of actin filaments. A drop of  
355 Young's modulus, a measure of cell deformability<sup>22</sup>, observed in cells subjected to  
356 OGD, suggests the reorganization of the cell cytoskeleton at the layer composed of the  
357 actin filaments. The most significant drop of Young's modulus was observed in SH-  
358 SY5Y cells measured directly after OGD. When cells were allowed to grow in fully  
359 reoxygenated conditions, their elastic properties returned to the level of control cells.  
360 The cell metabolic activity (MTS assay) and cell viability (LDH assay) showed that the  
361 number of alive cells remained within 83-88% for both control and OGD treated cells.

362 However, the metabolic activity of cells decreases with OGD duration, oppositely to  
363 changes observed in nanomechanical measurements.

364 Based on the obtained results, we propose the following mechanism leading to  
365 cell deformability changes during OGD. The observed time-dependent decrease of  
366 Young's modulus in control, non-OGD treated SH-SY5Y cells was gradual regardless of  
367 the indentation depths chosen for the analysis (for low indentations of 400 nm and  
368 deeper indentations of 1200 nm). Probably, it reflects the impact of glucose  
369 consumption on the mechanical properties of cells. As the dynamic of assembly and  
370 disassembly of F-actin is strongly dependent on the accessibility of adenosine  
371 triphosphate (ATP) molecules (ATP- G-actin binds to barbed end three times faster than  
372 GTP-G-actin,<sup>46</sup>), the reduction of ATP resulted in slow disassembly of cytoskeleton  
373 resulting in a gradual decrease of Young's modulus. A significantly lower level of ATP  
374 was reported to lead to cell softening<sup>47</sup>.

375 Several actin-associated proteins regulate actin polymerization/depolymerization as  
376 dynamic assembly and disassembly of the actin cytoskeleton is required for many  
377 biological processes, such as cell division, cell motility, endocytosis, and  
378 morphogenesis. These actin regulatory proteins contribute to nucleation,  
379 depolymerization, and fragmentation when a reorganization of the actin filaments is  
380 needed<sup>48–51</sup>. Cofilin is one of such proteins. It disassembles F-actin into tiny fragments  
381 of fibrous actin <sup>52</sup>. Although severing of F-actin by cofilin is independent of energy  
382 addition, the extensive reorganization of actin filaments demands high energy supplies  
383 <sup>53</sup>, in particular, to reach the level detected by AFM. It seems to be supported by the  
384 MTS assay showing unaltered metabolic activity of OGD-treated cells after one hour of

385 the treatment. We postulate that in our measurements during the initial OGD, alterations  
386 in mechanical properties of cells reflect the disassembling effect of cofilin on the cortical  
387 actin. The effect is evident in cells after 1 hour of OGD. It is additionally detectable in  
388 the experiments, in which changes in the effective surface area of a single cell are  
389 quantified. The OGD duration of 1 hour is sufficient to induce a significant (~20%)  
390 reduction of the mean single cell surface area and increase the cell height. Such  
391 increase suggested a more sparse actin scaffold and softening of the cells.

392 For longer OGD (3h and 12h), the cofilin-induced actin polymerization seems to be  
393 attenuated as changes in nanomechanical properties of OGD-treated cells are less  
394 pronounced. Severing and depolymerization of actin filaments by cofilin create many  
395 small F-actin fragments with new barbed ends needed for their polymerisation<sup>54,55</sup>.  
396 Simultaneously, after prolonged OGD time, cells are metabolically impaired as the MTS  
397 assay reveals a significant drop in the number of metabolically active cells. It makes the  
398 reorganization of the actin cortex less favorable, indicating that cofilin activity is inhibited  
399 by phosphorylation of the serine residues at position 3 near the N-end for longer OGD  
400 duration. As a result, polymerization and stabilization of actin filaments are observed<sup>56</sup>.  
401 Such effect leads to decreased cell deformability (cells become more rigid as Young's  
402 modulus increases) in cells, in which metabolic activity is low. The latter affect the  
403 rebuilding of the actin filaments network, which is low, as shown by small values of the  
404 surface area of a single cell in cells after 3h and 12h of OGD.

405 After reoxygenation, the surface area went back to the levels of controls, but  
406 mechanical properties did not fully recover. When comparing short-time OGD, the  
407 elasticity of the cortical layer (400 nm) was well restored. The deep indentation,

408 however, shows irreversible changes. Both shallow and deep indentations were  
409 irreversible after 12h OGD. The results contradict quantitative observation from actin  
410 and tubulin in fluorescence microscopy, where any significant change can be clearly  
411 observed. It indicates that changes in cell mechanics are more complex and cannot be  
412 explained only by actin (de) polymerization. Actin rearrangement via activation of  
413 profilin, cofilin and gelsolin, phosphorylation of myosin light chain, and changes in  
414 membrane spectrin cytoskeleton might be involved<sup>57</sup>. It should also be noted that in  
415 most studies, OGD constitutes the oxygen and glucose deprivations considered in  
416 parallel. Separating the specific oxygen- and glucose-related contributions calls for  
417 experiments conducted in conditions of either glucose or oxygen depletion<sup>58</sup>. The AFM-  
418 derived nanomechanical properties of OGD and non-OGD treated cells reveal  
419 a dominant role of glucose deprivation in 12 hours of OGD conditions that hinders the  
420 oxygen depletion effect.

421 Numerous research that use the OGD model to understand mechanisms  
422 involved in brain impairments<sup>59,60</sup> has demonstrated that the pathological process of  
423 ischemic stroke involves complex mechanisms acting on various cell types. These  
424 studies focus on cell or molecular biology aspects. Cofilin, being involved in the dynamic  
425 turnover of actin filaments, affects membrane integrity, receptor transport, and signal  
426 transduction. Understanding mechanisms responsible for cofilin-related changes of  
427 cytoskeleton remodeling, promise potential use of them to inhibit cofilin activity that  
428 might induce neuroprotection through targeting diverse cellular components and  
429 multiple pathways<sup>61,62</sup>.

430

431 **Methods**

432 **Cell culture**

433 For experimental procedures, an undifferentiated SH-SY5Y human neuroblastoma cell  
434 line was used. Cells were cultured in a Dulbecco's Modified Eagles' Medium (DMEM,  
435 ATCC, LGC Standards) supplemented with 10% Fetal Bovine Serum (FBS, ATCC, LGC  
436 Standards). Cells were cultured in 35 cm<sup>2</sup> culture flasks (TPP) and passaged (< 10) into  
437 the corresponding plastic media required in each experiment. Cells were culture in the  
438 CO<sub>2</sub> incubator (NUAIRE) at 37°C and 5%CO<sub>2</sub>/95% air atmosphere.

439

440 **OGD experiments**

441 Cells were passaged from the culture flask to the Petri dish (TPP) and kept in the CO<sub>2</sub>  
442 (37°C and 5%CO<sub>2</sub>/95% air atmosphere) for 24 hours in the DMEM (ATCC, LGC  
443 Standards) supplemented with 10% FBS. DMEM contains 4500 mg/L glucose and  
444 1 mM sodium pyruvate. After this time, the medium was replaced either with (1)  
445 neurobasal medium (NB) containing glucose (control cells, undergoing the same  
446 treatment as OGD cells but without applying OGD conditions) or with neurobasal A  
447 medium (NBA, without glucose used to create OGD conditions). NB is optimized for  
448 prenatal and fetal neurons. NBA is optimized for growing postnatal and adult brain  
449 neurons. These two media differ only in osmolality (260 mOsm versus 235 mOsm,  
450 respectively).

451 OGD conditions were obtained in the following way. Cells were placed in the  
452 temperature-controlled table CO<sub>2</sub> incubator (Olympus) at 37°C. The incubator was  
453 connected to a gas exchange 3-input system (Tokai Hit) supplying air, N<sub>2</sub>, and CO<sub>2</sub>. In



454 our system, CO<sub>2</sub> concentration remained constant (5%) while the air was replaced by  
455 N<sub>2</sub>, resulting in an oxygen concentration of 0.1%. The oxygen level was maintained  
456 constant by applying a gas flow at a level of 150 ml/min. These parameters were kept  
457 constant for 1, 3, and 12 hours. Immediately after applying OGD, cells were analyzed  
458 using various techniques: MTS and LDH assays, atomic force microscopy (AFM),  
459 epifluorescence, and confocal microscopy.

460

#### 461 **MTS assay**

462 The viability and metabolic activity of SH-5YSY cells were verified by using an MTS  
463 colorimetric test (Promega). Cells were cultured in 24-well plates in 1 ml of the culture  
464 medium (DMEM). Next, 100 µL of MTS reagent (tetrazolium compound) was added to  
465 the cells. Then, cells were incubated at 37°C in 95% air/5% CO<sub>2</sub> atmosphere in the  
466 CO<sub>2</sub> incubator (Nuair) for 2 h. The MTS method reduces tetrazolium compounds by  
467 viable cells to generate a colored formazan product soluble in cell culture media. The  
468 final volume of 1.1 mL was pipetted to 96-well plates with 100 µL per hole. The  
469 absorbance (OD = 490 nm) was recorded for 0h, 3h, and 24h after OGD using a  
470 spectrophotometer (ELISA SPECTROstar Nano, BMG LABTECH). The MTS assay was  
471 repeated three times.

472

#### 473 **LDH assay**

474 The cytotoxic effect of OGD was quantified by using CyQUANT™ LDH Cytotoxicity  
475 Assay Kit (Invitrogen). Cells were plated on 24-well plates in 1 ml of the corresponding  
476 culture medium (**Fig. 1**). LDH level was evaluated in the following samples, i.e., (i)

477 control and OGD cells, (ii) control and OGD cells treated with lysis buffer (10% by  
478 volume, 45 min in the CO<sub>2</sub> incubator), (ii) culture medium (supernatant) taken from  
479 control or OGD cells and separately treated with lysis buffer in an analogous way as (ii)  
480 to verify how much cells detached during the medium exchange. Then, 50 µl of the  
481 medium from each sample type was aspirated from each well and transferred into a 96-  
482 well plate. Next, to each well, 50 µl of the reaction mixture was added. After 1h of  
483 incubation in conditions protecting against light exposure, 50 µl of stop solution was  
484 added. Lactate dehydrogenase (LDH) is a cytosolic enzyme present in various cell  
485 types. Damage of cell membrane results in a release of LDH to the surrounding  
486 medium, which can be quantified by using LDH as a catalytic enzyme. It converts  
487 lactate to pyruvate *via* NAD<sup>+</sup> reduction to NADH. Oxidation of NADH by diphosphorase  
488 reduces a tetrazolium salt to a red formazan product. OD at 490nm was registered  
489 using an ELISA reader (Ledetect 96 ELISA, LED-based microplate reader, Labexim  
490 Products) to detect it. The level of formazan is directly proportional to the level of LDH in  
491 the surrounding medium. To obtain cell viability level the following equation was used:

492

$$493 \quad \%(\text{cell viability}) = 1 - \frac{\text{experimental LDH release } (OD_{490})}{\text{maximum LDH release } (OD_{490})} \quad (1)$$

494

495 where the maximum LDH release is the sum of LDH release in Triton X100 treated  
496 samples (cells and supernatants of control and OGD-treated cells, respectively).

497

498 **Phospho-Cofilin/Cofilin assay**

499 To obtain changes in cofilin activity level, CytoGlow™ Cofilin (Phospho-Ser3)  
500 Colorimetric Cell-Based ELISA Kit was applied (Assay Biotechnology) to monitor target  
501 proteins concentration, here, in cells undergoing OGD treatment. Briefly, SH-SY5Y cells  
502 (50,000 per well) were plated on a 96-well plate. After OGD experiments, cells were  
503 fixed using 4% paraformaldehyde and washed three times with 200 µl with Wash Buffer  
504 (WB) for 5 minutes, each time gentle shook. Then, 100 µl of quenching solution was  
505 added for 20 minutes at room temperature (RT), followed by 3 times washing with WB  
506 for 5 minutes at a time. Next, 200 µl of Blocking Buffer was added for 1 hour at RT, and,  
507 afterwards, the plate was washed again (3 x times, WB at RT). Then, a solution of 50 µl  
508 of each primary antibody against phosphorylated cofilin (Anti-Cofilin (Phospho-Ser3)  
509 antibody), cofilin (Anti-cofilin antibody) and Glyceraldehyde 3-phosphate  
510 dehydrogenase, GAPDH (Anti-GAPDH antibody) was added to the corresponding well  
511 and incubated for 16 hours (overnight) at 4°C. Afterwards, they were rinsed 3 times with  
512 200 µl of WB for 5 minutes. In the next step, secondary antibodies (horseradish  
513 peroxidase (HRP)-conjugated antiRabbit IgG antibody and/or HRP-conjugated anti-  
514 Mouse IgG antibody) were added (50 µl) for 1.5 incubation at RT. After incubation, the  
515 plate with cells was washed, and 50 µl of Ready-to-Use Substrate was added to each  
516 well for 30 minutes at RT, followed by adding a Stop Solution. OD at 450 nm was  
517 immediately read using a microplate reader (ELISA SPECTROstar Nano, BMG  
518 LABTECH).

519

520

521 **Atomic force microscope (AFM)**

522 The mechanical properties of cells were measured using AFM (CellHesion, Bruker-JPK,  
523 Germany). The microscope is equipped with a constant temperature system. In our  
524 experiments, the temperature was set to 32°C to provide the cell survival conditions and  
525 the cantilever stability. Cells were indented with silicon nitride cantilevers (ORC-8,  
526 Bruker) characterized by a nominal spring constant of 0.03 N/m and an open half-angle  
527 of 36°. All measurements were conducted in a force spectroscopy mode. The spring  
528 constants of used cantilevers were determined using the Sader method<sup>63</sup>. The average  
529 value was  $0.058 \pm 0.005$  for  $n = 8$  cantilevers. A force map of 6 per 6 pixels  
530 (corresponding to a 6  $\mu\text{m} \times 6 \mu\text{m}$  scan size) was recorded on each cell.

531 The force curves (i.e. the dependence of the cantilever deflection recorded as a function  
532 of relative sample position) were acquired at the approach/retract velocity of 8  $\mu\text{m}/\text{s}$ . On  
533 individual plastic Petri dishes, two groups of force curves were collected. First,  
534 calibration curves were acquired on a Petri dish bottom surface (a reference calibration  
535 curve). Next, force curves were recorded on living cells. Next, force curves were  
536 recorded on living cells. Force curves were collected by setting a grid of 6  $\times$  6 points  
537 that corresponded to 6  $\mu\text{m} \times 6 \mu\text{m}$  scan area. A grid was set over the nuclear region to  
538 minimize the influence of the underlying stiff plastic surface. All measurements were  
539 conducted in DMEM and were repeated 3 times.

540

#### 541 **Young's modulus determination**

542 The subtraction of the calibration curves from a curve collected on a living cell produces  
543 the relation between load force and indentations depth. This relation was analyzed

544 using the Hertz-Sneddon contact mechanics. The AFM probe was approximated by the  
545 cone that resulted in the following relation between load force and indentation depth:

546

$$547 \quad F(\delta) = \frac{2 \cdot \tan(\alpha)}{\pi} \cdot \frac{E_{\text{cell}}}{1 - \mu^2} \cdot \delta^2 \quad (2)$$

548

549 where  $F$  is load force,  $\delta$  is the indentation depth,  $E_{\text{cell}}$  is the apparent Young's modulus  
550 of the cell, and  $\mu$  is the Poisson's ratio (equalled to 0.5 assuming that cells are  
551 incompressible materials). The final modulus value was expressed as a mean and  
552 standard deviation from all measured cells.

553

#### 554 **Fluorescence (epifluorescence and confocal) microscopy**

555 Visualization of actin filaments, microtubules, and cell nuclei was performed by using  
556 Olympus IX83 (Olympus, Japan) fluorescence microscope equipped in objectives 20x  
557 and 40x magnification, 100 W mercury lamp (illuminating the whole cell area uniformly),  
558 and a set of filters to record emission at 594 nm and 420 nm. Images were collected  
559 using Orca Spark digital camera providing a 2.3 megapixel (1920x1200) pixel image  
560 and analyzed with ImageJ (ImageJ 1.53e <https://imagej.nih.gov/ij/>). Cells cultured on  
561 24-well plates were fixed in 3.7% paraformaldehyde, then they were washed with  
562 phosphate-buffered saline (PBS, Sigma), treated with a cold 0.2% Triton X-100 solution,  
563 and again washed with the PBS buffer. Afterwards, cells were incubated with  $\beta$ -tubulin  
564 antibody conjugated with Cy3 for 24 hours. The next day, samples were stained with  
565 phalloidin conjugated with AlexaFluor 488 dye during 1h incubation. Cell nuclei were  
566 stained by 10 min incubation with Hoechst dye.

567 Confocal images of actin and microtubular cytoskeleton were recorded at the  
568 Laboratory of in vivo and in vitro Imaging (Maj Institute of Pharmacology Polish  
569 Academy of Science, Cracow, Poland). They were recorded using a Leica TCS SP8  
570 WLL confocal microscope equipped with new-generation HyD detectors set at 415-450  
571 nm (Hoechst) and 509-560 nm (Alexa Fluor 488). Fluorescent dyes were excited by  
572 diode lasers: 405 nm (Hoechst) and white light laser with emission wavelength set at  
573 499 nm (AlexaFluor 488). Images were registered using an oil immersion 63x objective  
574 lens (HC PL APO CS2 NA 1.40).

575

#### 576 **Surface area determination**

577 A single cell effective surface area (SA) was applied to characterize how well cells  
578 spread on the surface at given conditions. This value describes an average surface  
579 area occupied by an individual cell. Images of fluorescently stained cells (F-actin using  
580 phalloidin-Alexa Fluor 488 dye, cell nuclei by Hoechst 33342) were binarised using  
581 ImageJ software. From these images, the surface area occupied by cells was  
582 determined. Next, cell nuclei were manually counted to receive the number of cells.  
583 Finally, the surface area occupied by cells was divided by the number of cells that  
584 enabled the calculation of the effective surface area of a single cell. Images were  
585 acquired during three repetitive experiments, which resulted in 20 images per condition  
586 to be analyzed. The total number of cells was at least 8000 cells.

587

588

589

590 **Nucleus – to – cytoplasm (N/C ratio)**

591 To obtain the N/C, the effective area of individual cell nuclei was quantified analogously  
592 as the effective surface area of a single cell was determined. Next, the effective surface  
593 area of a single nucleus was divided by the effective surface area of a single cell. The  
594 total number of images analyzed was 20 per condition.

595

596 **Statistical analysis**

597 All data are presented as the mean  $\pm$  standard deviation from n repetitions. In all  
598 figures, box plots were applied to show the basic statistical descriptors: mean (open  
599 square), median (black line), standard deviation (whiskers), and 25% and 75%  
600 percentiles (box). Statistical significance was verified by applying the non-parametric  
601 Mann-Whitney test (Origin 9.2 Pro). Significance is indicated by p values (ns – not  
602 statistically different,  $p > 0.05$ ; \* $p < 0.05$ , \*\* $p < 0.01$ , \*\*\* $p < 0.001$ ).

603

604 **Acknowledgments:**

605 TZ acknowledges the support of project no. POWR.03.02.00-00-I013/16 (InterDokMed).  
606 The APC was funded by project no. POWR.03.02.00-00-I013/16 (InterDokMed)". The  
607 authors are thankful to prof. Danuta Jantas and prof. Halina Jurkowska for sharing the  
608 SH-SY5Y cell lines.

609

610 **Author Contributions:**

611 Conceptualization, TZ, ML, JP and BZ; methodology, TZ and ML; validation, TZ, BZ, JP  
612 and ML; formal analysis, TZ; investigation, TZ; resources, ML; data curation, TZ; writing

613 - original draft preparation, TZ, BZ, JP, ML; writing—review and editing TZ, BZ, JP, ML;  
614 confocal images visualization, JW; cell cultures, JP; supervision, ML and JP; funding  
615 acquisition, ML; All authors have read and agreed to the published version of the  
616 manuscript.

617

618 **Data Availability Statement:**

619 **Correspondence** and requests for materials should be addressed to ML.

620

621 **Competing interests**

622 The authors declare no competing interests

623

624



625 **FIGURE CAPTIONS:**

626 **Figure 1.** (a) A scheme showing three steps of sequential OGD applied to living SH-  
627 SY5Y cells. Firstly, cells were cultured for 24 hours after seeding in 5% CO<sub>2</sub>, 95%  
628 atmosphere (37°C) in a DMEM with 4500 mg/ml of glucose (DMEM(+G)). They refer  
629 here as control cells. Next, the medium was exchanged to NBA(-G), and cells were  
630 placed in a table CO<sub>2</sub> incubator for 1h, 3h, or 12h at 0.1% O<sub>2</sub> (referred to as OGD  
631 conditions and OGD cells). Finally, OGD cells were rinsed with a DMEM(+G) in the  
632 atmosphere of 5% CO<sub>2</sub> and 95% air (reoxygenation conditions, , in addition, non-OGD  
633 cells were kept in DMEM(+G)). **(b)** Phase-contrast image showing the morphology of  
634 neuroblastoma SH-SY5Y cells cultured for 24h in NB(+G), as it induced differentiation  
635 resulting in a neuron-like morphology with numerous, fine protrusions (neurite-like  
636 structures). Scale bar – 50 μm.

637

638 **Figure 2.** Metabolic level and viability of SH-SY5Y neuroblastoma cells assessed by  
639 MTS (a,b) and LDH (c,d) assays, directly after OGD (a,c) and after 24h of  
640 reoxygenation (b,d). Each dot denotes a single readout from the ELISA reader. (a, b) A  
641 mean (open circle), median (black line), standard deviation (SD, box size) were  
642 determined from data gathered from 3 independent repetitions. (c,d) Columns represent  
643 a mean value from 12 ELISA readouts ( $n = 3$  independent repetitions). Relative  
644 absorbance was normalized to values obtained for the control samples. Statistical  
645 significance: *ns* – not statistically significant,  $p > 0.05$ ,  $*p < 0.05$ ,  $***p < 0.001$ .

646

647 **Figure 3.** Nanomechanical properties of SH-SY5Y neuroblastoma cells after OGD  
648 treatment, quantified by the apparent Young's modulus calculated for the indentation  
649 depth of 400 nm **(a)** and 1200 nm **(b)**. Four groups of cells were compared: control (C,  
650 NB(+G)), OGD cells (OGD 1h, 3h, or 12h, NBA(-G)), reoxygenated OGD cells (RO 24h,  
651 DMEM(+G)), and control, non-OGD cells (C 24h) kept in DMEM(+G) for the same time  
652 as reoxygenated OGD cells. Box plots represent a median (black line), a mean (solid  
653 square), standard deviation (whiskers), and 25% and 75% percentiles (box) from  $n = 60$

654 cells. Statistical significance: ns – not statistically significant ( $p > 0.05$ ),  $*p < 0.05$ ,  
655  $**p < 0.01$ ,  $***p < 0.001$ .

656

657 **Figure 4.** Confocal images of the actin cytoskeleton in OGD-treated and reoxygenated  
658 cells. Staining: actin filaments – phalloidin conjugated with Alexa Fluor 488, cell nuclei –  
659 Hoechst 33342; scale bar 25  $\mu\text{m}$ .

660

661 **Figure 5.** Spreading area (SA) of cells after OGD (a) and reoxygenation (b). Each dot  
662 denotes an average surface area of individual cells. Boxplot represents basic statistical  
663 parameters (mean, median, standard deviation, and 25% and 75% percentiles from  
664  $n = 60$  fluorescent images). Statistical significance: ns – not statistically significant  
665 ( $p > 0.05$ ),  $*p < 0.05$ ,  $***p < 0.001$ .

666

667 **Figure 6.** Nucleus to cytoplasm (N/C) ratio of cells after OGD treatment and  
668 reoxygenation. Each dot denotes an average value of individual cells. Boxplot  
669 represents basic statistical parameters, i.e., mean (open square), median (line), and  
670 standard deviation, from  $n = 60$  cells. Statistical significance: ns – not statistically  
671 significant  $*p < 0.05$ ,  $***p < 0.001$ .

672

673 **Figure 7.** Cofilin and p-cofilin (phosphorylated cofilin) expression level in SH-SY5Y cells  
674 upon 1h (a) and 12h (b) OGD. Control cells were kept in NB(+G), while OGD cells were  
675 kept in NBA(-G). A mean (black square), median (black middle line), standard deviation  
676 (SD, outside black lines) were determined from data gathered from 3 independent  
677 repetitions. Statistical significance (ns – not statistically significant,  $**p < 0.01$ ,  $***p <$   
678 0.001).

679 **References**

- 680 1. Katan, M. & Luft, A. Global Burden of Stroke. *Semin. Neurol.* **38**, 208–211 (2018).
- 681 2. Sennfalt, S., Norrving, B., Petersson, J. & Ullberg, T. Long-Term Survival and  
682 Function after Stroke: A Longitudinal Observational Study from the Swedish  
683 Stroke Register. *Stroke* **50**, 53–61 (2019).
- 684 3. Tasca, C. I., Dal-Cim, T. & Cimarosti, H. In vitro oxygen-glucose deprivation to  
685 study ischemic cell death. *Methods Mol. Biol.* **1254**, 197–210 (2015).
- 686 4. Kalogeris, T., Baines, C. P., Krenz, M. & Korthuis, R. J. Cell biology of  
687 ischemia/reperfusion injury. *Int. Rev. Cell Mol. Biol.* **298**, 229–317 (2012).
- 688 5. Shi, Y. *et al.* Rapid endothelial cytoskeletal reorganization enables early blood-  
689 brain barrier disruption and long-term ischaemic reperfusion brain injury. *Nat.*  
690 *Commun.* **7**, 10523 (2016).
- 691 6. Wang, R. *et al.* Oxygen-Glucose deprivation induced Glial scar-like change in  
692 Astrocytes. *PLoS One* **7**, e37574 (2012).
- 693 7. Spence, E. F. & Soderling, S. H. Actin out: Regulation of the synaptic  
694 cytoskeleton. *J. Biol. Chem.* **290**, 28613–28622 (2015).
- 695 8. Etienne-Manneville, S. Actin and microtubules in cell motility: Which one is in  
696 control? *Traffic* **5**, 470–477 (2004).
- 697 9. Schoumacher, M., Goldman, R. D., Louvard, D. & Vignjevic, D. M. Actin,  
698 microtubules, and vimentin intermediate filaments cooperate for elongation of  
699 invadopodia. *J. Cell Biol.* **189**, 541–556 (2010).
- 700 10. Hohmann & Dehghani. The Cytoskeleton—A Complex Interacting Meshwork.  
701 *Cells* **8**, 362 (2019).

- 702 11. Kristó, I., Bajusz, I., Bajusz, C., Borkúti, P. & Vilmos, P. Actin, actin-binding  
703 proteins, and actin-related proteins in the nucleus. *Histochem. Cell Biol.* **145**,  
704 373–388 (2016).
- 705 12. Tilve, S., Difato, F. & Chieragatti, E. Cofilin 1 activation prevents the defects in  
706 axon elongation and guidance induced by extracellular alpha-synuclein. *Sci. Rep.*  
707 **5**, 16524 (2015).
- 708 13. Bamburg, J. R., Minamide, L. S., Wiggan, O., Tahtamouni, L. H. & Kuhn, T. B.  
709 Cofilin and actin dynamics: Multiple modes of regulation and their impacts in  
710 neuronal development and degeneration. *Cells* **10**, 2726 (2021).
- 711 14. Suurna, M. V. *et al.* Cofilin mediates ATP depletion-induced endothelial cell actin  
712 alterations. *Am. J. Physiol. - Ren. Physiol.* **290**, F1398–F1407 (2006).
- 713 15. Chen, B. *et al.* Cofilin Inhibition by Limk1 Reduces Rod Formation and Cell  
714 Apoptosis after Ischemic Stroke. *Neuroscience* **444**, 64–75 (2020).
- 715 16. Wiggan, O., Shaw, A. E., DeLuca, J. G. & Bamburg, J. R. ADF/Cofilin Regulates  
716 Actomyosin Assembly through Competitive Inhibition of Myosin II Binding to F-  
717 Actin. *Dev. Cell* **22**, 530–543 (2012).
- 718 17. Liu, Y. *et al.* Human ischaemic cascade studies using SH-SY5Y cells: A  
719 systematic review and meta-analysis. *Transl. Stroke Res.* **9**, 564–574 (2018).
- 720 18. Kovalevich, J. & Langford, D. Considerations for the use of SH-SY5Y  
721 neuroblastoma cells in neurobiology. *Methods Mol. Biol.* **1078**, 9–21 (2013).
- 722 19. Lopes, F. M. *et al.* Comparison between proliferative and neuron-like SH-SY5Y  
723 cells as an in vitro model for Parkinson disease studies. *Brain Res.* **1337**, 85–94  
724 (2010).

- 725 20. Appukuttan, T. A. *et al.* Parkinson's disease cybrids, differentiated or  
726 undifferentiated, maintain morphological and biochemical phenotypes different  
727 from those of control cybrids. *J. Neurosci. Res.* **91**, 963–970 (2013).
- 728 21. Binnig, G., Quate, C. F. & Gerber, C. Atomic force microscope. *Phys. Rev. Lett.*  
729 **56**, 930–933 (1986).
- 730 22. Lekka, M. Discrimination Between Normal and Cancerous Cells Using AFM.  
731 *Bionanoscience* **6**, 65–80 (2016).
- 732 23. Pyka-Fościak, G., Zemła, J., Lis, G. J. J., Litwin, J. A. A. & Lekka, M. Changes in  
733 spinal cord stiffness in the course of experimental autoimmune encephalomyelitis,  
734 a mouse model of multiple sclerosis. *Arch. Biochem. Biophys.* **680**, 108221  
735 (2020).
- 736 24. Ciasca, G. *et al.* Nanomechanical signature of brain tumours. *Nanoscale* **8**,  
737 19629–19643 (2016).
- 738 25. Ciasca, G. *et al.* Mapping viscoelastic properties of healthy and pathological red  
739 blood cells at the nanoscale level. *Nanoscale* **7**, 17030–17037 (2015).
- 740 26. Fang, Y. *et al.* Investigating dynamic structural and mechanical changes of  
741 neuroblastoma cells associated with glutamate-mediated neurodegeneration. *Sci.*  
742 *Rep.* **4**, 7074 (2014).
- 743 27. Kubiak, A. *et al.* Stiffening of DU145 prostate cancer cells driven by actin  
744 filaments-microtubule crosstalk conferring resistance to microtubule-targeting  
745 drugs. *Nanoscale* **13**, 6212–6226 (2021).
- 746 28. Gostek, J. *et al.* Nano-characterization of two closely related melanoma cell lines  
747 with different metastatic potential. *Eur. Biophys. J.* **44**, 49–55 (2015).

- 748 29. Scudiero, D. A. *et al.* Evaluation of a Soluble Tetrazolium/Formazan Assay for  
749 Cell Growth and Drug Sensitivity in Culture Using Human and Other Tumor Cell  
750 Lines. *Cancer Res.* **48**, 4827–4833 (1988).
- 751 30. Lee, W. T. *et al.* Neuroprotective effects of agmatine on oxygen-glucose deprived  
752 primary-cultured astrocytes and nuclear translocation of nuclear factor-kappa B.  
753 *Brain Res.* **1281**, 64–70 (2009).
- 754 31. Yang, Y. & Sauve, A. A. NAD(+) metabolism: Bioenergetics, signaling and  
755 manipulation for therapy. *Biochim. Biophys. Acta* **1864**, 1787–1800 (2016).
- 756 32. Liu, H. B. *et al.* The effects of ABCG2 on the viability, proliferation and paracrine  
757 actions of kidney side population cells under oxygen-glucose deprivation. *Int. J.*  
758 *Med. Sci.* **11**, 1001–1008 (2014).
- 759 33. Chighizola, M., Puricelli, L., Bellon, L. & Podestà, A. Large colloidal probes for  
760 atomic force microscopy: Fabrication and calibration issues. *J. Mol. Recognit.* **34**,  
761 e2879 (2021).
- 762 34. Sneddon, I. N. The relation between load and penetration in the axisymmetric  
763 boussinesq problem for a punch of arbitrary profile. *Int. J. Eng. Sci.* **3**, 47–57  
764 (1965).
- 765 35. Fujii, Y. *et al.* Spatiotemporal dynamics of single cell stiffness in the early  
766 developing ascidian chordate embryo. *Commun. Biol.* **4**, 341 (2021).
- 767 36. Chighizola, M. *et al.* Adhesion force spectroscopy with nanostructured colloidal  
768 probes reveals nanotopography-dependent early mechanotransductive  
769 interactions at the cell membrane level. *Nanoscale* **12**, 14708–14723 (2020).
- 770 37. Bernstein, B. W. & Bamburg, J. R. ADF/Cofilin: A functional node in cell biology.

- 771 *Trends Cell Biol.* **20**, 187–195 (2010).
- 772 38. Bravo-Cordero, J. J., Magalhaes, M. A. O., Eddy, R. J., Hodgson, L. & Condeelis,  
773 J. Functions of cofilin in cell locomotion and invasion. *Nat. Rev. Mol. Cell Biol.* **14**,  
774 405–417 (2013).
- 775 39. Bamburg, J. R. & Bernstein, B. W. Roles of ADF/cofilin in actin polymerization and  
776 beyond. *F1000 Biol. Rep.* **2**, 62 (2010).
- 777 40. Kleman, A. M., Yuan, J. Y., Aja, S., Ronnett, G. V. & Landree, L. E. Physiological  
778 glucose is critical for optimized neuronal viability and AMPK responsiveness in  
779 vitro. *J. Neurosci. Methods* **167**, 292–301 (2008).
- 780 41. Cross, J. L., Meloni, B. P., Bakker, A. J., Lee, S. & Knuckey, N. W. Modes of  
781 neuronal calcium entry and homeostasis following cerebral ischemia. *Stroke Res.*  
782 *Treat.* **2010**, 316862 (2010).
- 783 42. Carinci, M. *et al.* Different roles of mitochondria in cell death and inflammation:  
784 Focusing on mitochondrial quality control in ischemic stroke and reperfusion.  
785 *Biomedicines* **9**, 169 (2021).
- 786 43. Chen, H. *et al.* Oxidative stress in ischemic brain damage: Mechanisms of cell  
787 death and potential molecular targets for neuroprotection. *Antioxid. Redox Signal.*  
788 **14**, 1505–1517 (2011).
- 789 44. Michalski, D. *et al.* A novel approach for mechanical tissue characterization  
790 indicates decreased elastic strength in brain areas affected by experimental  
791 thromboembolic stroke. *Neuroreport* **26**, 583–587 (2015).
- 792 45. Discher, D. E., Janmey, P. & Wang, Y. L. Tissue cells feel and respond to the  
793 stiffness of their substrate. *Science* **310**, 1139–1143 (2005).

- 794 46. Korn, E. D., Carlier, M. F. & Pantaloni, D. Actin polymerization and ATP  
795 hydrolysis. *Science* **238**, 638–644 (1987).
- 796 47. Aronoff, S. L., Berkowitz, K., Shreiner, B. & Want, L. Glucose Metabolism and  
797 Regulation: Beyond Insulin and Glucagon. *Diabetes Spectr.* **17**, 183–190 (2004).
- 798 48. Pollard, T. D., Blanchoin, L. & Mullins, R. D. Molecular mechanisms controlling  
799 actin filament dynamics in nonmuscle cells. *Annu. Rev. Biophys. Biomol. Struct.*  
800 **29**, 545–576 (2000).
- 801 49. Brunello, E. *et al.* Myosin filament-based regulation of the dynamics of contraction  
802 in heart muscle. *Proc. Natl. Acad. Sci.* **117**, 8177–8186 (2020).
- 803 50. Schaks, M., Giannone, G. & Rottner, K. Actin dynamics in cell migration. *Essays*  
804 *Biochem.* **63**, 483–495 (2019).
- 805 51. Le, S., Yu, M., Bershadsky, A. & Yan, J. Mechanical regulation of formin-  
806 dependent actin polymerization. *Sem. Cell Develop. Biol.* **102**, 73–80 (2020).
- 807 52. Condeelis, J. How is actin polymerization nucleated in vivo? *Trends Cell Biol.* **11**,  
808 288–293 (2001).
- 809 53. Kuiper, J. W. P. *et al.* Creatine kinase-mediated ATP supply fuels actin-based  
810 events in phagocytosis. *PLoS Biol.* **6**, 0568–0580 (2008).
- 811 54. Papakonstanti, E. A. & Stournaras, C. Cell responses regulated by early  
812 reorganization of actin cytoskeleton. *FEBS Letters* **582**, 2120–2127 (2008).
- 813 55. Oser, M. & Condeelis, J. The cofilin activity cycle in lamellipodia and invadopodia.  
814 *J. Cell. Biochem.* **108**, 1252–1262 (2009).
- 815 56. Moriyama, K., Iida, K. & Yahara, I. Phosphorylation of Ser-3 of cofilin regulates its  
816 essential function on actin. *Genes Cells* **1**, 73–86 (1996).



- 817 57. Li, H. *et al.* Cytoskeleton Remodeling Induces Membrane Stiffness and Stability  
818 Changes of Maturing Reticulocytes. *Biophys. J.* **114**, 2014–2023 (2018).
- 819 58. Mathews, E. H., Stander, B. A., Joubert, A. M. & Liebenberg, L. Tumor cell culture  
820 survival following glucose and glutamine deprivation at typical physiological  
821 concentrations. *Nutrition* **30**, 218–227 (2014).
- 822 59. Hoshi, Y. *et al.* Ischemic brain injury leads to brain edema via hyperthermia-  
823 induced TRPV4 activation. *J. Neurosci.* **38**, 5700–5709 (2018).
- 824 60. Tornabene, E., Helms, H. C. C., Pedersen, S. F. & Brodin, B. Effects of oxygen-  
825 glucose deprivation (OGD) on barrier properties and mRNA transcript levels of  
826 selected marker proteins in brain endothelial cells/astrocyte co-cultures. *PLoS*  
827 *One* **14**, e0221103 (2019).
- 828 61. Alhabidi, Q., Sayeed, M.S.B., Shah, Z.A. Cofilin as a Promising Therapeutic  
829 Target for Ischemic and Hemorrhagic Stroke. *Transl. Stroke Res.* **7**, 33-41 (2016).
- 830 62. Xu, M.-S., *et al.* Cerebral Ischemia-Reperfusion Is Associated With Upregulation  
831 of Cofilin-1 in the Motor Cortex. *Front. Cell Dev. Biol.* **9**, 634347 (2021).
- 832 63. Sader, J. E., Larson, I., Mulvaney, P. & White, L. R. Method for the calibration of  
833 atomic force microscope cantilevers. *Rev. Sci. Instrum.* **66**, 3789–3798 (1995).
